# Supplementary material for: Are miRNA-103, miRNA-107 and miRNA-122 Involved in the Prevention of Liver Steatosis Induced by Resveratrol?
Source: MDPI journal article supplement (doi:10.3390/nu9040360), 2017-04-04
Supplement: s1 [file s1]

# Supplementary Material: Are miRNA-103, miRNA-107 and miRNA-122 Involved in the Prevention of Liver Steatosis Induced by Resveratrol?

Ana Gracia, Alfredo Fernández-Quintela, Jonatan Miranda, Itziar Eseberri, Marcela González and María P. Portillo

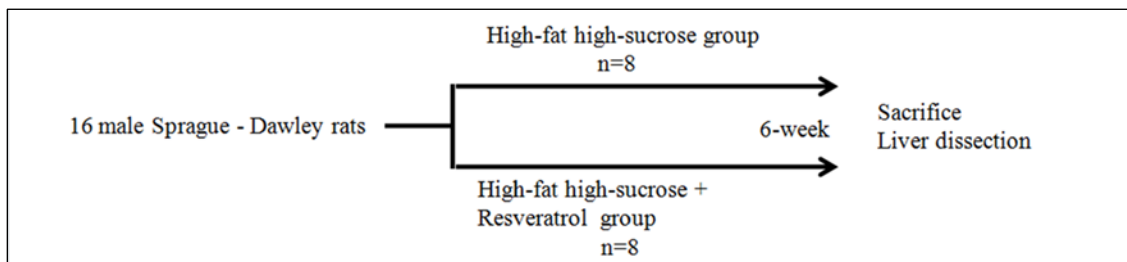

**Figure S1.** Diagram of the work-plan for the in vivo study.

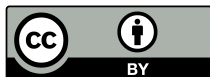

© 2017 by the authors. Licensee MDPI, Basel, Switzerland. This article is an open access article distributed under the terms and conditions of the Creative Commons by Attribution (CC-BY) license (<http://creativecommons.org/licenses/by/4.0/>).
